# Supplementary material for: In Silico Discovery of a Substituted 6-Methoxy-quinaldine with Leishmanicidal Activity in Leishmania infantum
Source: PubMed Central journal article supplement (PMC6017605; doi:10.3390/molecules23040772), 2018-03-27
Supplement: molecules-23-00772-s001.pdf [file molecules-23-00772-s001.pdf]

1 **Supplementary Material:**  
2 **In Silico Discovery of a Substituted**  
3 **6-Methoxy-quinalidine with Leishmanicidal Activity**  
4 **in *Leishmania infantum***

5 **Strahinja Stevanović<sup>1\*</sup>, Andrej Perdih<sup>2\*</sup>, Milan Senćanski<sup>1</sup>, Sanja Glišić<sup>1</sup>,**  
6 **Margarida Duarte<sup>3</sup>, Anna Tomás<sup>3</sup>, Filipa V. Sena<sup>4</sup>, Filipe M. Sousa<sup>4</sup>, Manuela M.**  
7 **Pereira<sup>4, 5</sup> and Tom Solmajer<sup>2</sup>**

8 <sup>1</sup> *Center of Multidisciplinary Research, Institute of Nuclear Sciences "Vinča", University of Belgrade, 11001 Belgrade,*  
9 *Serbia*

10 <sup>2</sup> *National Institute of Chemistry, Hajdrihova 19, 1001 Ljubljana, Slovenia*

11 <sup>3</sup> *i3S-Instituto de Investigação e Inovação em Saúde, Universidade do Porto and IBMC-Institute for Molecular and Cell*  
12 *Biology, 4099-002 Porto, Portugal*

13 <sup>4</sup> *ICBAS, Instituto de Ciências Biomédicas Abel Salazar, Universidade do Porto, 4099-002 Porto, Portugal*

14 <sup>5</sup> *Instituto de Tecnologia Química e Biológica António Xavier, Universidade Nova de Lisboa, 1099-085 Oeiras, Portugal*

15 <sup>6</sup> *University of Lisbon, Faculty of Sciences, BioISI-Biosystems & Integrative Sciences Institute, Campo Grande,*  
16 *C8,1749-016 Lisboa, Portugal*

17 \* Correspondence: sstevanovic@vin.bg.ac.rs;

18 \* Correspondence: andrej.perdih@ki.si; Tel.: +386-1-4760-376

19

20

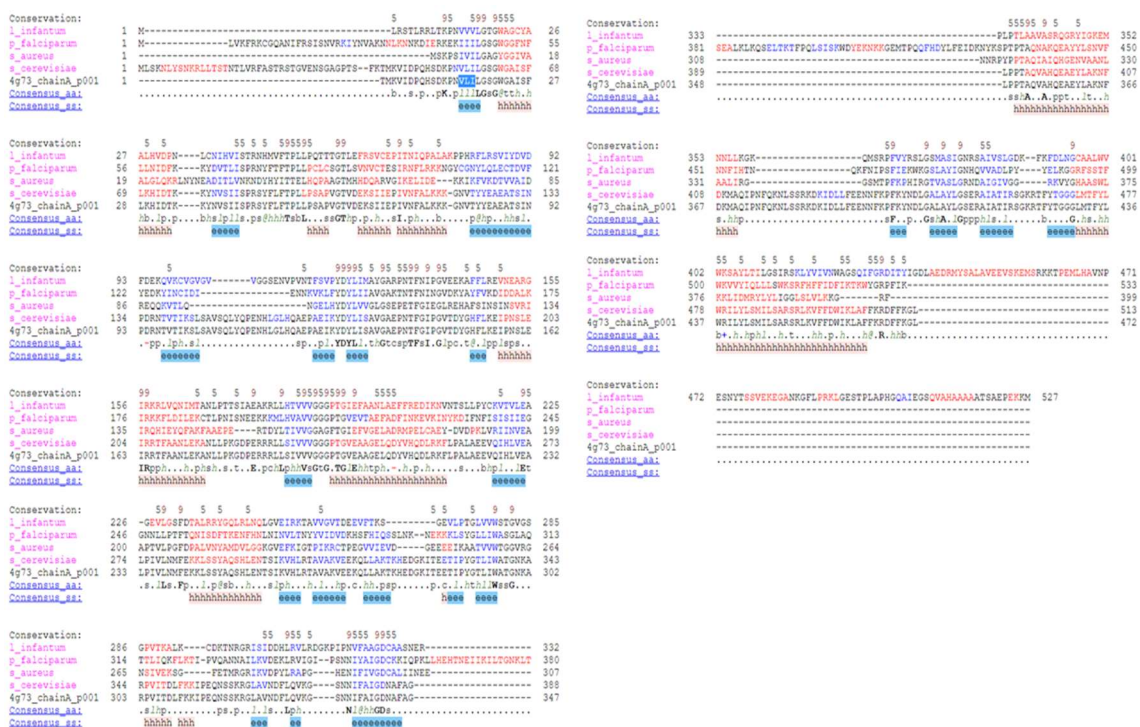

21  
 22 **Figure S1.** Secondary Structure Alignment generated from LiNDH2, ScNDH2, SaNDH2 and PfNDH2 sequence  
 23 alignment using PROMALS3D: a tool for multiple sequence and structure alignment. For the reference template  
 24 —PDB ID 4g73 is used (available crystal structure of ScNDH2). In consensus secondary structure line: With  
 25 letter “h” chain—alfa-helix is marked, and with “e” chain, beta-sheet.  
 26

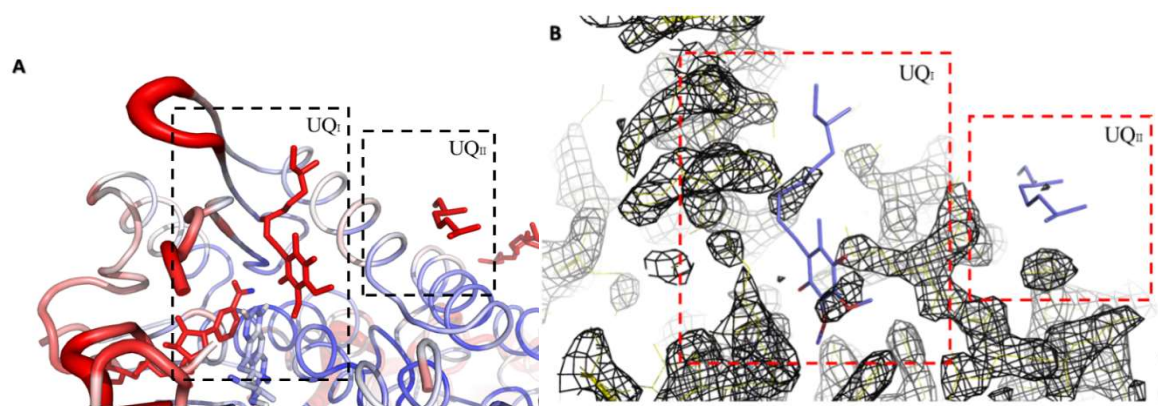

27  
 28 **Figure S2. (A)** B-factor representation of *S. cerevisiae* NDH-2 (PDB ID: 4G73) focused on binding site—UQI  
 29 which contains UQ, FAD and NADH as a form of ternary complex. Color code: white(high)-to-red(low)  
 30 quantification of atom position certainty, traced using pymol software. **(B)** Isomesh displayed using pymol's  
 31 CCP4—format electron density mapping. Lower electron density population is shown in the region of  
 32 second—UQII binding site, thus making it difficult to deduce conformational occupancy of UQ and amino acid  
 33 residues from X-ray structure.

34 **Table S1.** Homology models generated using Phyre 2 server. First two homologues structural models are  
 35 shown;

| Template                                                   | Confidence | % i.d. | Template Information                                                                                                                                                                                                                                                                                  |
|------------------------------------------------------------|------------|--------|-------------------------------------------------------------------------------------------------------------------------------------------------------------------------------------------------------------------------------------------------------------------------------------------------------|
| 4G6G_B<br>4G73_B<br>(same seq.)                            | 100.0      | 33     | <b>PDB header:</b> oxidoreductase<br><b>Chain:</b> B: <b>PDB Molecule:</b> rotenone-insensitive nadh-ubiquinone oxidoreductase,<br><b>PDBTitle:</b> crystal structure of NDH-2 with TRT<br><b>Resolution:</b> 2.5 Å                                                                                   |
| 4XDB_C                                                     | 100        | 27     | <b>PDB header:</b> oxidoreductase, membrane protein, flavoprotein<br><b>Chain:</b> C: <b>PDB Molecule:</b> nadh dehydrogenase-like protein saouhsc_00878;<br><b>PDBTitle:</b> nadh:quinone oxidoreductase (ndh-ii) from staphylococcus aureus -2 holo protein structure.<br><b>Resolution:</b> 3.32 Å |
| Note: For both templates alignment coverage is around 80 % |            |        |                                                                                                                                                                                                                                                                                                       |

36

37 **Table S2.** Obtained pharmacophore and docking scores for twenty-three selected hit compounds.

| No. | Scaffold                  | Pose/conformation | PharmFit | GOLD.fitness |
|-----|---------------------------|-------------------|----------|--------------|
| 1   | PYRROLE                   | 1                 | 48.2     | 78.9353      |
|     |                           | 2                 | 48.2     | 78.8489      |
|     |                           | 3                 | 48.2     | 73.5001      |
| 2   | CHROMEN                   | 1                 | 47.4     | 71.5822      |
|     |                           | 2                 | 47.4     | 71.1047      |
|     |                           | 3                 | 47.4     | 67.7467      |
| 3   | benzofuro[3,2-d]pyrimidin | 1                 | 46.62    | 71.1031      |
|     |                           | 2                 | 46.62    | 67.5164      |
|     |                           | 3                 | 46.62    | 67.4288      |
| 4   | THYENO[3,2-d]PYRIMIDIN    | 1                 | 49.46    | 67.0032      |
|     |                           | 2                 | 49.46    | 66.7081      |
|     |                           | 3                 | 49.46    | 64.9063      |
| 5   | CHROMEN                   | 1                 | 47.02    | 70.0423      |
|     |                           | 2                 | 47.02    | 67.3608      |
|     |                           | 3                 | 47.02    | 66.6311      |

|    |                        |   |       |         |
|----|------------------------|---|-------|---------|
| 6  | quinazoline            | 1 | 48.01 | 71.0211 |
|    |                        | 2 | 48.01 | 70.8991 |
|    |                        | 3 | 48.01 | 69.7889 |
| 7  | INDAZOLE               | 1 | 47.28 | 74.1601 |
|    |                        | 2 | 47.28 | 72.2617 |
|    |                        | 3 | 47.28 | 60      |
| 8  | BENZYMIDAZOLE          | 1 | 46.25 | 73.6621 |
|    |                        | 2 | 46.25 | 71.6988 |
|    |                        | 3 | 46.25 | 65.6762 |
| 9  | O,M-METOXY             | 1 | 49.57 | 66.1606 |
|    |                        | 2 | 49.57 | 66.0541 |
|    |                        | 3 | 49.57 | 66.189  |
| 10 | PYRROLE                | 1 | 47.41 | 83.8593 |
|    |                        | 2 | 47.41 | 82.4897 |
|    |                        | 3 | 47.41 | 80.6411 |
| 11 | nitroisoquinoline      | 1 | 46.43 | 69.5886 |
|    |                        | 2 | 46.43 | 68.1004 |
|    |                        | 3 | 46.43 | 66.7446 |
| 12 | TRIAZOLO[4,3-a]PYRIDIN | 1 | 46.83 | 72.574  |
|    |                        | 2 | 46.83 | 70.5994 |
|    |                        | 3 | 46.83 | 60      |
| 13 | THYENO[3,2-d]PYRIMIDIN | 1 | 46.33 | 73.0864 |
|    |                        | 2 | 46.33 | 72.0532 |
|    |                        | 3 | 46.33 | 69.4898 |
| 14 | dihydrophthalazine     | 1 | 50.63 | 72.2082 |
|    |                        | 2 | 50.63 | 71.9494 |
|    |                        | 3 | 50.63 | 71.0051 |
| 15 | quinoline              | 1 | 47.45 | 79.2522 |
|    |                        | 2 | 47.45 | 77.9944 |
|    |                        | 3 | 47.45 | 77.1914 |
| 16 | quinazoline            | 1 | 47.72 | 77.3913 |
|    |                        | 2 | 47.72 | 75.1822 |
|    |                        | 3 | 47.72 | 71.6327 |
| 17 | quinoline              | 1 | 49.78 | 74.6217 |
|    |                        | 2 | 49.78 | 74.0581 |

|           |                |   |       |         |
|-----------|----------------|---|-------|---------|
|           |                | 3 | 49.78 | 73.5339 |
| <b>18</b> | QUINAZOLINE    | 1 | 49.8  | 70.3329 |
|           |                | 2 | 49.8  | 69.9571 |
|           |                | 3 | 49.8  | 68.429  |
| <b>19</b> | nitroquinoline | 1 | 49.45 | 74.248  |
|           |                | 2 | 49.45 | 73.1649 |
|           |                | 3 | 49.45 | 69.6986 |
| <b>20</b> | naphthalene    | 1 | 46.1  | 73.5739 |
|           |                | 2 | 46.1  | 72.3605 |
|           |                | 3 | 46.1  | 60      |
| <b>21</b> | benzothiazine  | 1 | 46.04 | 64.2407 |
|           |                | 2 | 46.04 | 63.8897 |
|           |                | 3 | 46.04 | 62.9287 |
| <b>22</b> | aniline        | 1 | 46.53 | 63.8863 |
|           |                | 2 | 46.53 | 61.1532 |
|           |                | 3 | 46.53 | 60      |
| <b>23</b> | pyrrole        | 1 | 47.52 | 71.4297 |
|           |                | 2 | 47.52 | 70.6303 |
|           |                | 3 | 47.52 | 60      |
| REF       | ubiquinone     | 1 | 50    | 80-84   |
|           |                | 2 | 50    | 80-84   |
|           |                | 3 | 50    | 80-84   |

38 **Table S3.** Selected commercially available compounds derived from ligand-based virtual screening campaign  
 39 against *LiNDH2*.

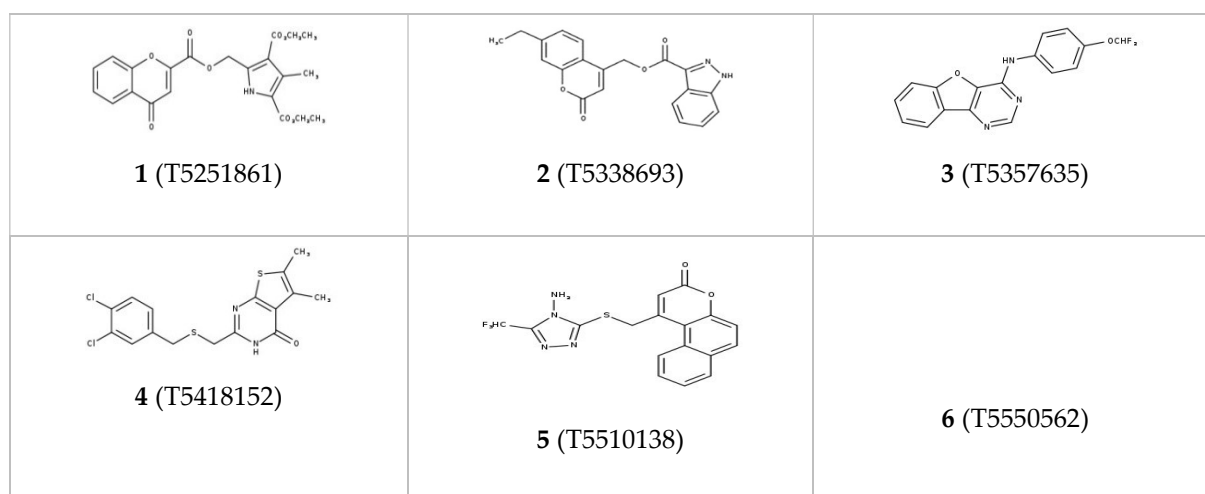

|                                                                                                                  |                                                                                                                  |                                                                                                                    |
|------------------------------------------------------------------------------------------------------------------|------------------------------------------------------------------------------------------------------------------|--------------------------------------------------------------------------------------------------------------------|
| 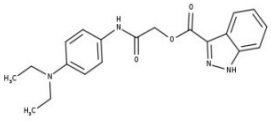 <p><b>7</b> (T5826550)</p>     |  <p><b>8</b> (T5925359)</p>     |  <p><b>9</b> (T5268007)</p>     |
|  <p><b>10</b> (T5368230)</p>    |  <p><b>11</b> (T5320777)</p>    |  <p><b>12</b> (T5803358)</p>    |
|  <p><b>13</b> (T5811637)</p>    |  <p><b>14</b> (T5973959)</p>    |  <p><b>15</b> (STK061205)</p>   |
|  <p><b>16</b> (STK047376)</p> |  <p><b>17</b> (STK002301)</p> |  <p><b>18</b> (STK149674)</p> |
|  <p><b>19</b> (STK085541)</p> |  <p><b>20</b> (STK118160)</p> |  <p><b>21</b> (STK042244)</p> |
|  <p><b>22</b> (STK140911)</p> |  <p><b>23</b> (T5330742)</p>  |                                                                                                                    |

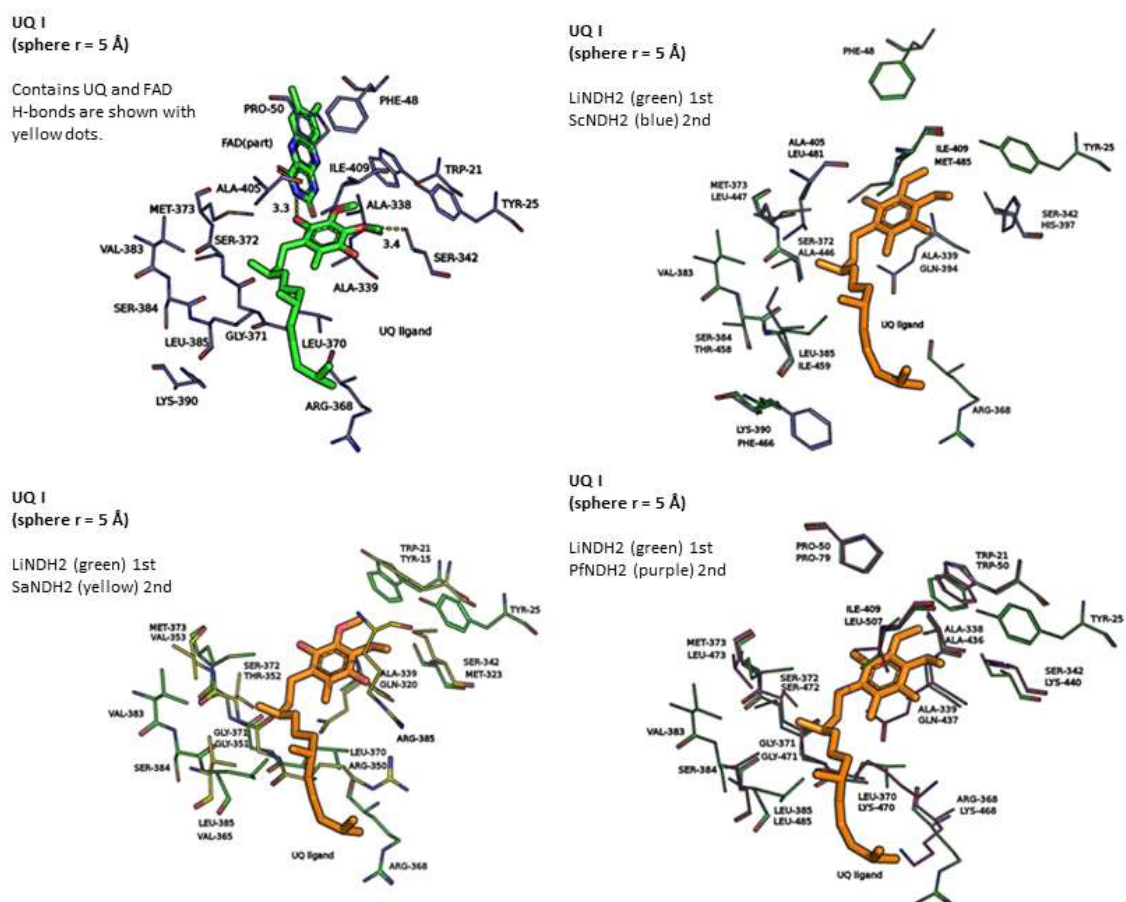

41

42 **Figure S3.** Binding site comparison of different NDH-2s. Upper left—binding site UQ<sub>i</sub> in the model *Li*NDH2  
 43 showing UQ molecule and important residues. Upper right—comparison of UQ<sub>i</sub> between *Li*NDH2 and  
 44 *Sc*NDH2. Lower left—comparison of UQ<sub>i</sub> between *Li*NDH2 and *Sa*NDH2. Lower right—comparison of UQ<sub>i</sub>  
 45 between *Li*NDH2 and *Pf*NDH2. For clarity reasons, only the differences in amino acid between structures are  
 46 shown in comparisons.



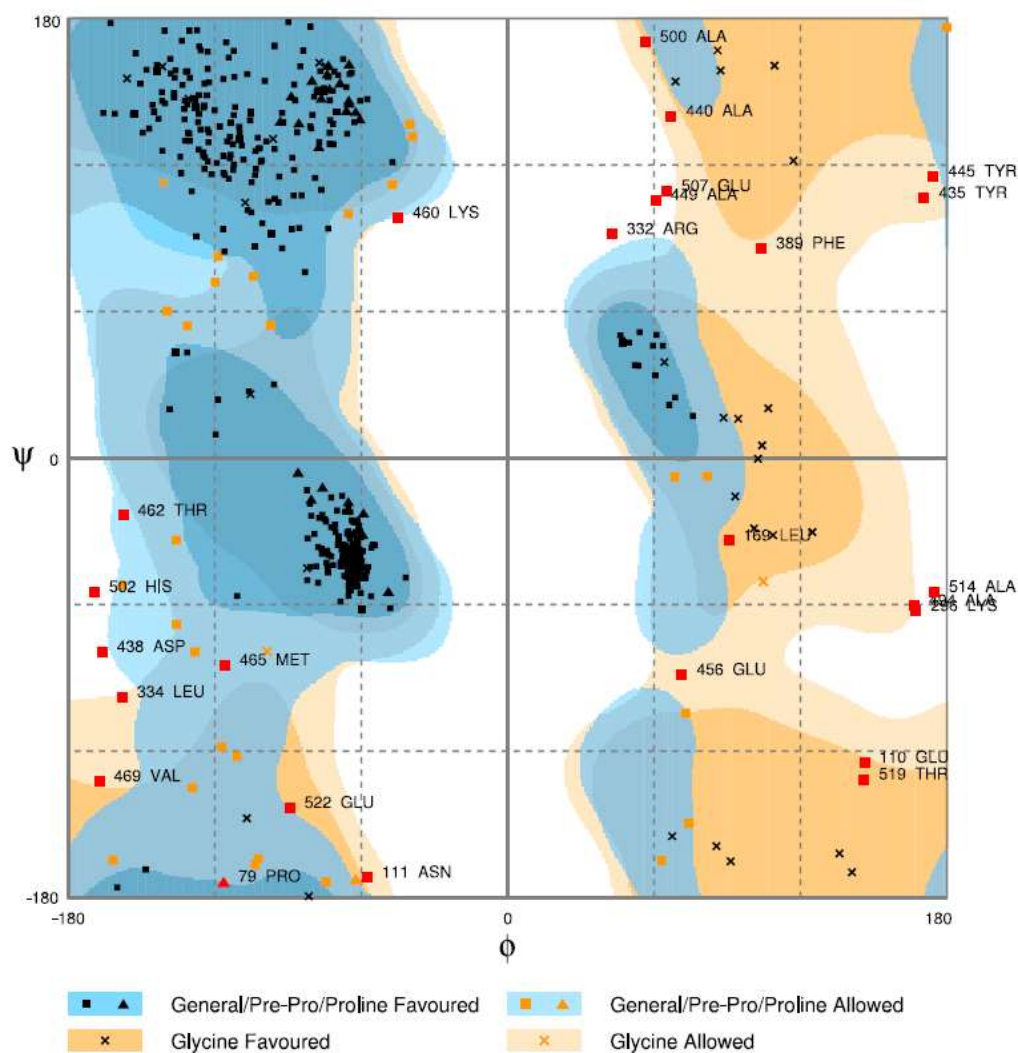

47

48 **Figure S4.** Ramachandran plot for *LiNDH-2*, calculated using RAMPAGE.

49

50 **Table S4.** Docked UQ in homology structure of *LiNDH2* against UQ experimental posing from template  
 51 structure 4G73. RMSD value refers to conformational differences in active site features, amino acid  
 52 environment.

| Docked UQ vs reference—UQ experimental | RMSD (Å) |
|----------------------------------------|----------|
| UQ  dock 1—reference                   | 1.9159   |
| UQ  dock 2—reference                   | 1.9501   |
| UQ  dock 3—reference                   | 1.2439   |
| UQ  dock 4—reference                   | 1.7549   |

53

54

55

56



## Testing Hypothesis

| GOLD Fitness Score        |           |
|---------------------------|-----------|
| <u>H1 (Ser342, Tyr25)</u> | <u>Ho</u> |
| 64.1708                   | 66.303    |
| 61.1928                   | 65.8198   |
| 66.7914                   | 63.7807   |
| 66.8341                   | 63.2555   |
| 65.5948                   | 62.5137   |
| 65.4237                   | 60.5077   |
| 65.7175                   | 59.7846   |
| 65.6428                   | 58.5946   |
| ...                       | ...       |

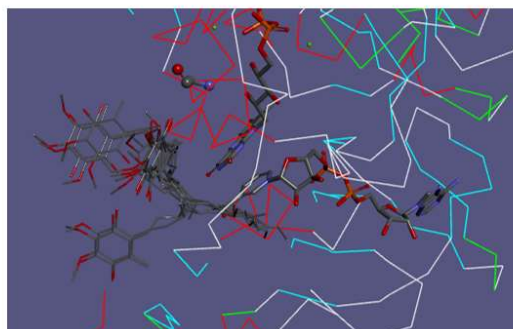

57

58 **Figure S5.** Results of testing of the docking modes of UQ without Ser324 and Tyr25

59

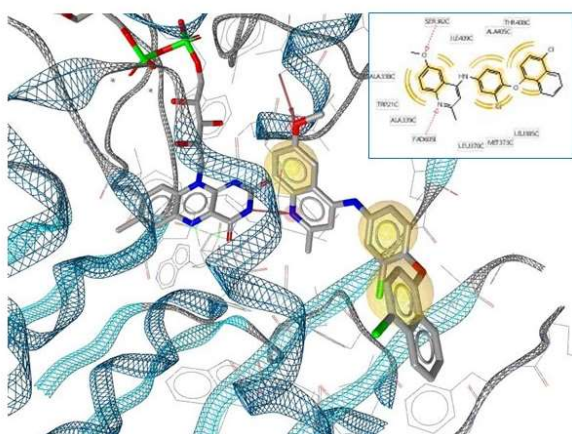

3D Structure-based pharmacophore model generated from docked compound 15 docked into LiNDH2 Active Site (UQ).

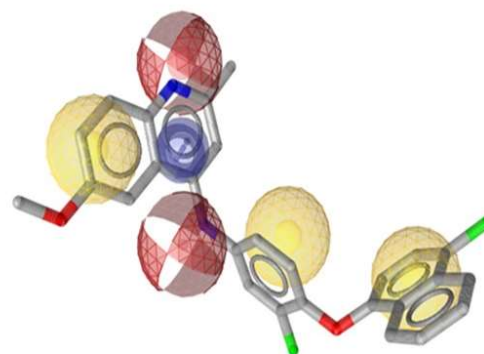

3D Ligand-based pharmacophore model 2 with screening result compound 15 aligned.

60

61 **Figure S6.** Proof of structure-based and ligand-based consensus in case of compound 15. Pharmacophore model  
62 generated from active compounds predicts functional group composition as a blueprint necessary for  
63 interaction with *Li*NDH2 structure.
